# Supplementary material
Source: Springer Nature journal article supplement (https://www.springermedizin.de/resource/supplementary/12914_2004_15_MOESM2_ESM.pdf/9537332)
Supplement: MOESM2 [file 9537332]

MUMBAI  
(BOMBAY)

# RCH Program area

BANGALORE  
MYSORE  
CHENNAI  
(MADRAS)

Viraipet taluk

Hunsur taluk

Mysore taluk

Zone 5

Zone 4

Heggadadevanakote

Way to Mysore

Zone 6

METIKUPPE  
FOREST

TARAKA RIVER

Zone 3

KABINI  
DAM

Saragur

UGU RIVER

UGU  
DAM

Nanjangud taluk

KAKANAKOTE  
FOREST

KABINI RIVER

Zone 1

Kenchanahalli

Brahmagiri

Masahalli

Zone 2

Macandrayadi Rd

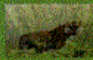

BEGUR  
FOREST

AINURMARIGUDI  
FOREST

K E R A L A

Gundlupet taluk
